# Supplementary material
Source: PubMed Central journal article supplement (PMC3183144)
Supplement: NIHMS315049-supplement-1.pdf [file NIHMS315049-supplement-1.pdf]

SUPPLEMENTAL MATERIAL

Charlson Comorbidity Index Adjustment In Intracerebral Hemorrhage

Manuscript #: STROKE/2011/617639

Supplemental Table 3. Independent Impact of CCI on 12-month Functional Outcome after ICH  
(including 3 patients with repeat ICH)

| <b>Predictor</b>         | <b>Odds Ratio for 1 point worsening on mRS (95% CI)</b> | <b>p</b> |
|--------------------------|---------------------------------------------------------|----------|
| CCI = 1                  | 1.75 (0.84-3.63)                                        | 0.131    |
| CCI = 2                  | 2.52 (1.07-5.93)                                        | 0.034    |
| CCI ≥ 3                  | 3.45 (1.65-7.22)                                        | 0.001    |
| Age (per year)           | 1.04 (1.02-1.06)                                        | <0.001   |
| Hematoma Volume (per mL) | 1.02 (1.01-1.04)                                        | 0.003    |
| GCS (per point increase) | 0.73 (0.66-0.80)                                        | <0.001   |

Analysis adjusted for presence of IVH, infratentorial ICH origin, and use of early DNR orders. CCI groups are referenced against the group with CCI score=0. CCI=Charlson Comorbidity Index; mRS= modified Rankin Scale score; CI= confidence interval

Note: Subjects with recurrent ICH during the study period (n=3) were treated as independent subjects.

Supplemental Table 4. Independent Impact of CCI on 12-month Functional Outcome after ICH  
(excluding 18 patients with possible underlying lesions)

| <b>Predictor</b>         | <b>Odds Ratio for 1 point worsening on mRS (95% CI)</b> | <b>p</b> |
|--------------------------|---------------------------------------------------------|----------|
| CCI = 1                  | 1.85 (0.88-3.91)                                        | 0.106    |
| CCI = 2                  | 2.31 (0.95-5.59)                                        | 0.063    |
| CCI ≥ 3                  | 3.54 (1.62-7.77)                                        | 0.002    |
| Age (per year)           | 1.04 (1.02-1.06)                                        | <0.001   |
| Hematoma Volume (per mL) | 1.02 (1.01-1.04)                                        | 0.004    |
| GCS (per point increase) | 0.74 (0.67-0.82)                                        | <0.001   |

Analysis adjusted for presence of IVH, infratentorial ICH origin, and use of early DNR orders. CCI groups are referenced against the group with CCI score=0. CCI=Charlson Comorbidity Index; mRS= modified Rankin Scale score; CI= confidence interval
